# Supplementary material
Source: PubMed Central journal article supplement (PMC10014496)

# Supplemental Figure 1

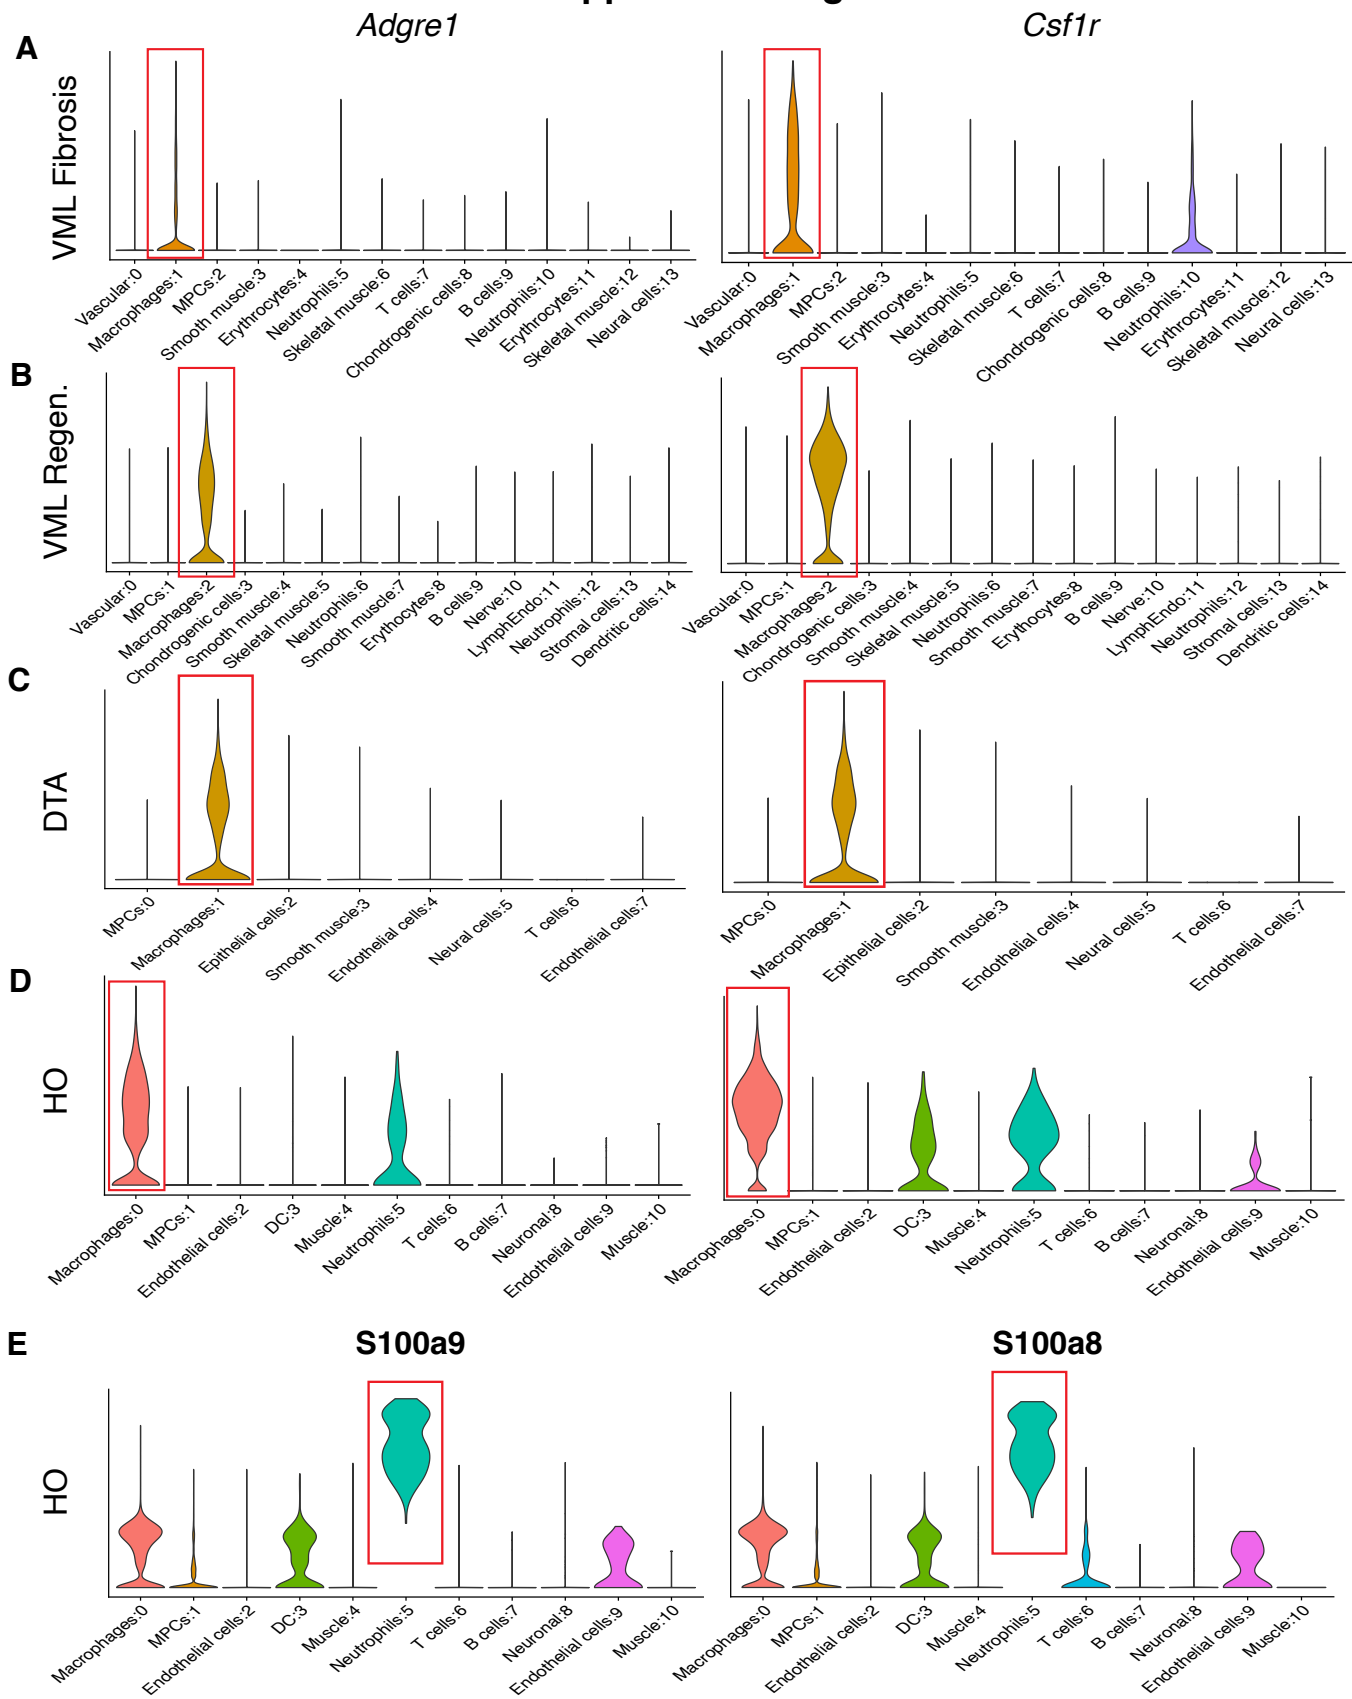

# Supplemental Figure 2

**A**

LIGER

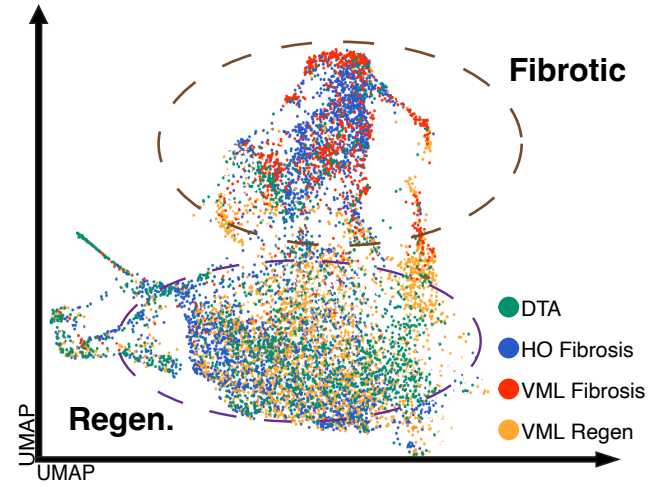

**B**

SEURAT Integration

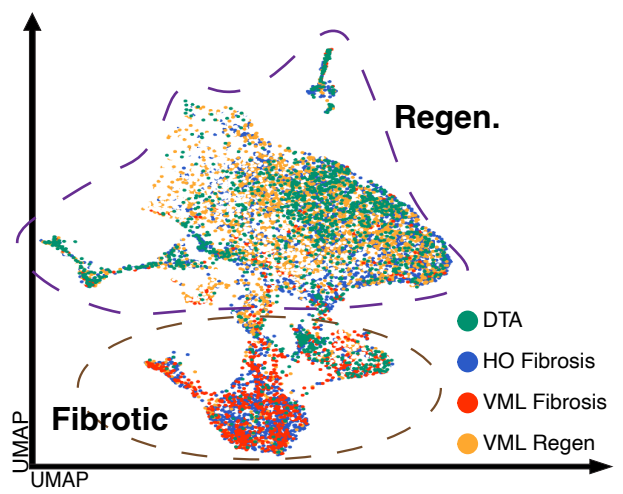

# Supplemental Figure 3

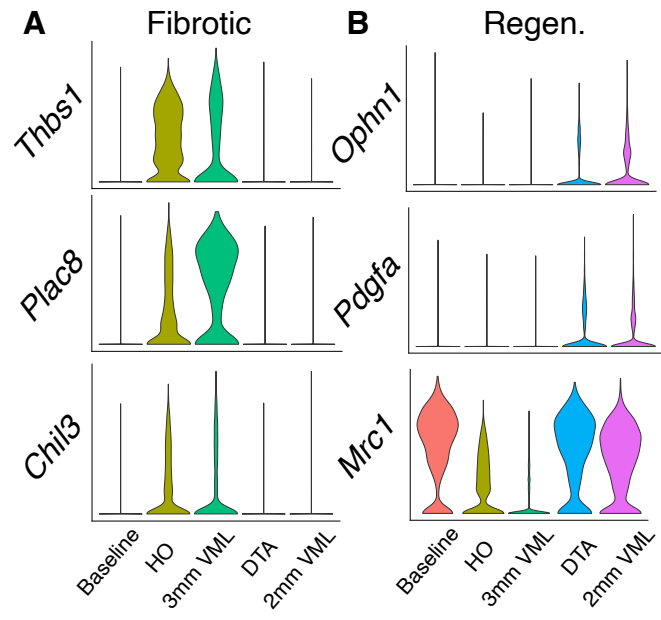

# Supplemental Figure 4

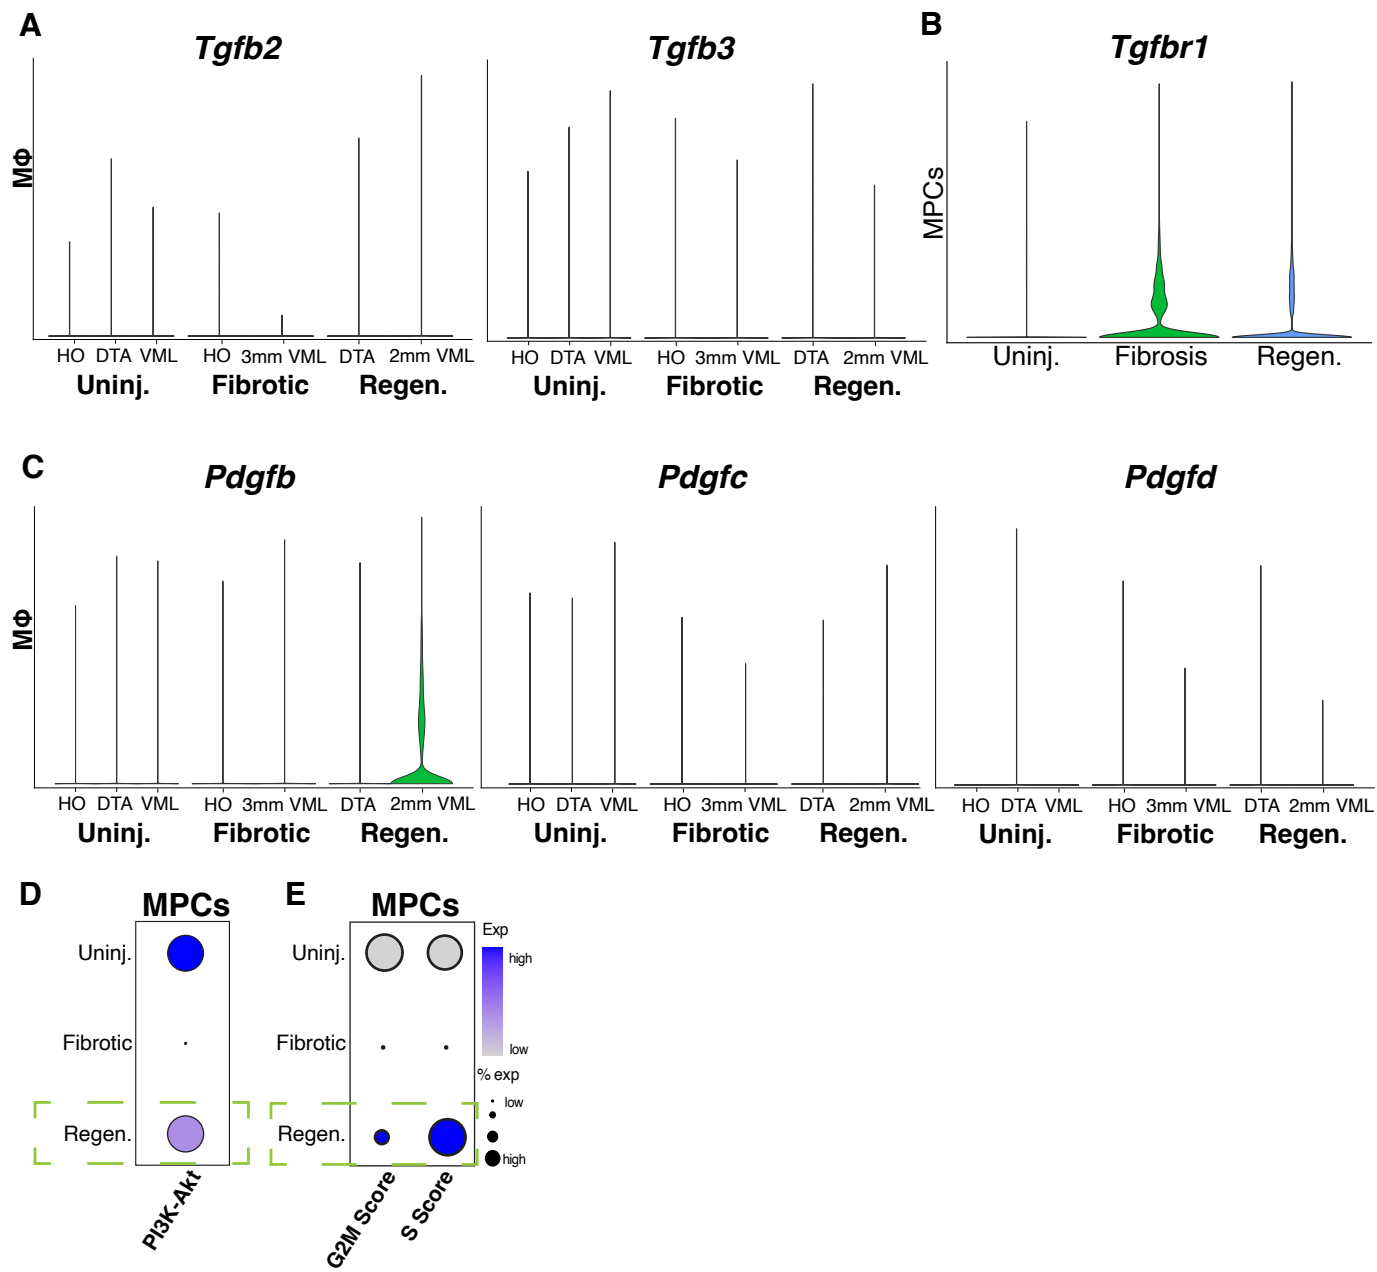

Supplement: NIHMS1834148-supplement-Supplemental_Figures.pdf [file NIHMS1834148-supplement-Supplemental_Figures.pdf]
